# Supplementary material
Source: PubMed Central journal article supplement (PMC9190126)
Supplement: 12879_2022_7513_MOESM1_ESM.pdf [file 12879_2022_7513_MOESM1_ESM.pdf]

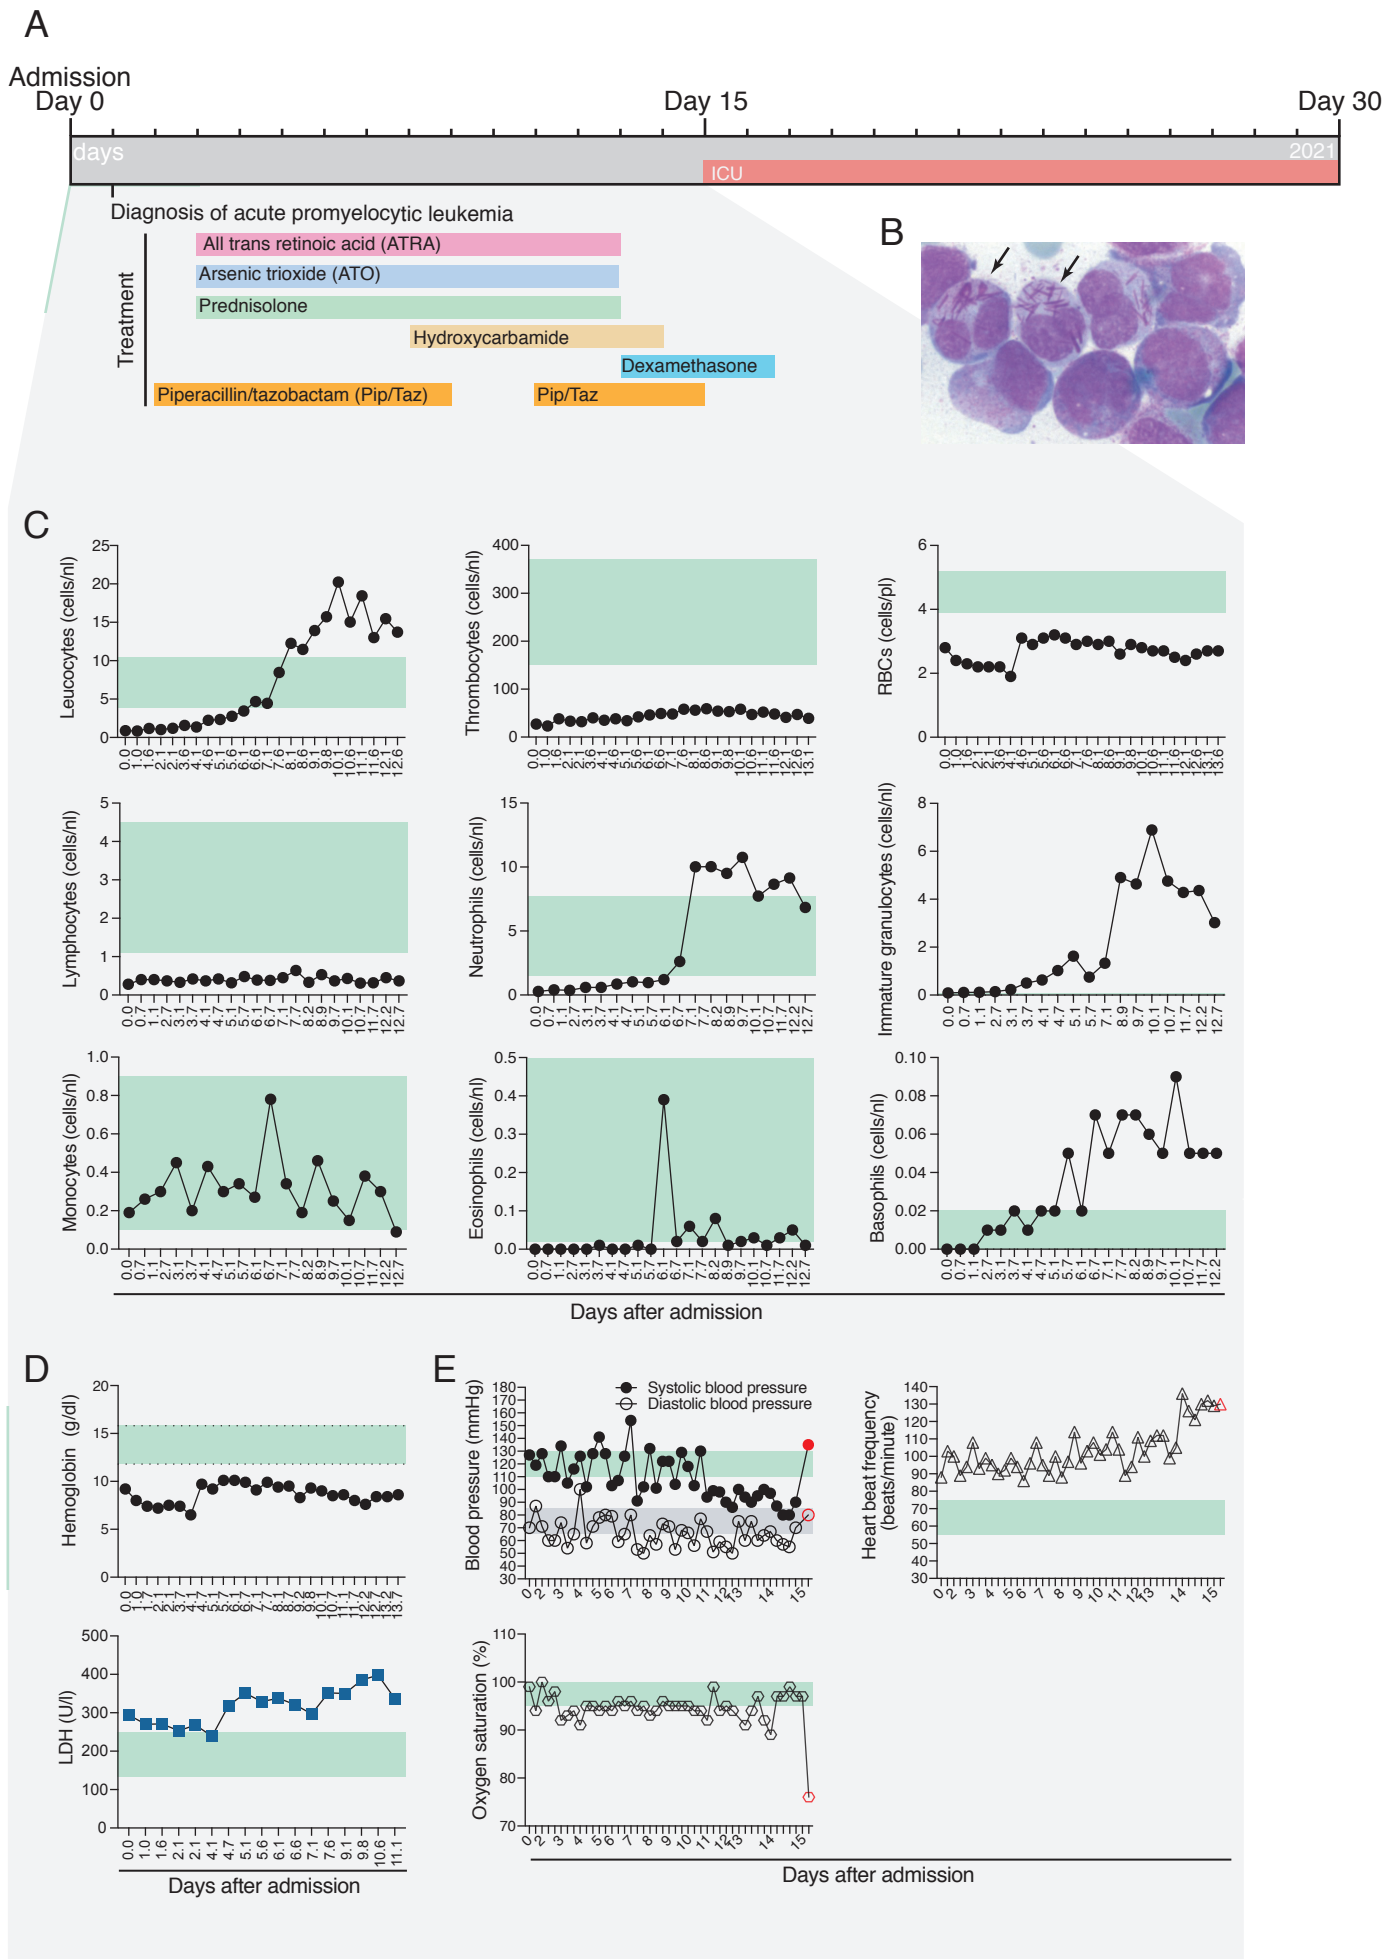

Supplementary figure 1

Radiological assessment  
(Days after admission)

Day 2

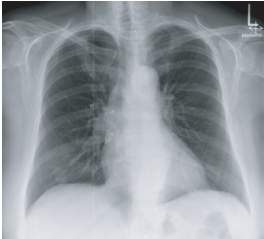

Day 11

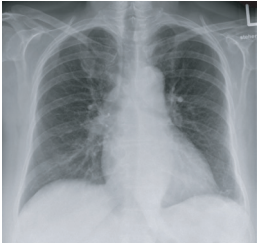

Day 15

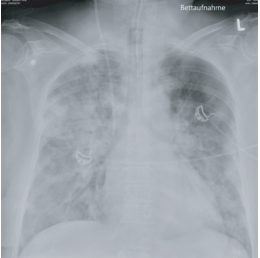

SARS-CoV-2  
positive RT-PCR

Day 17

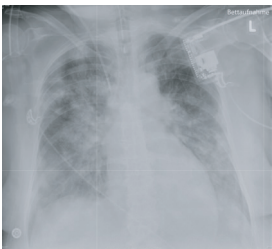

Day 18

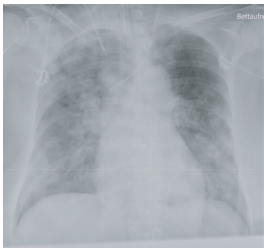

Day 22

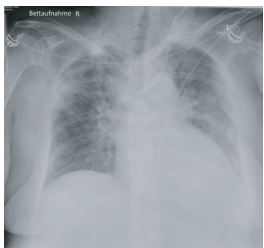

Day 30

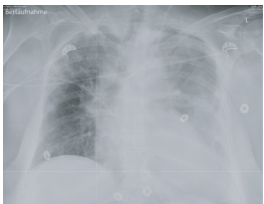

Supplementary figure 2

A

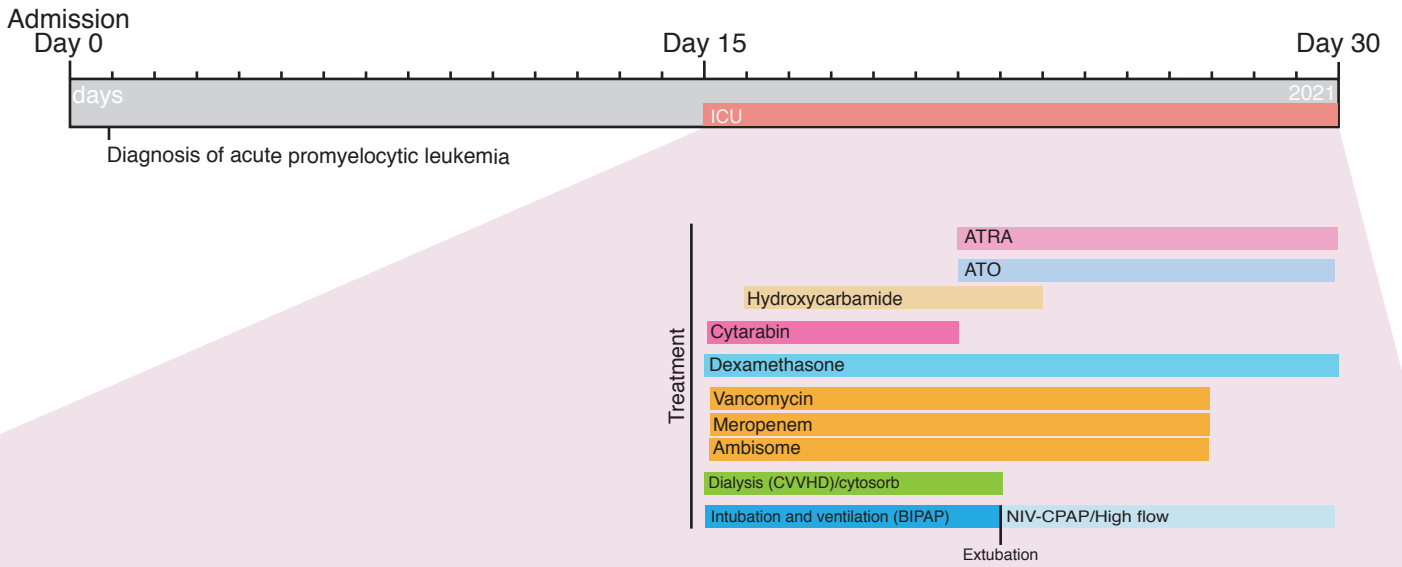

B

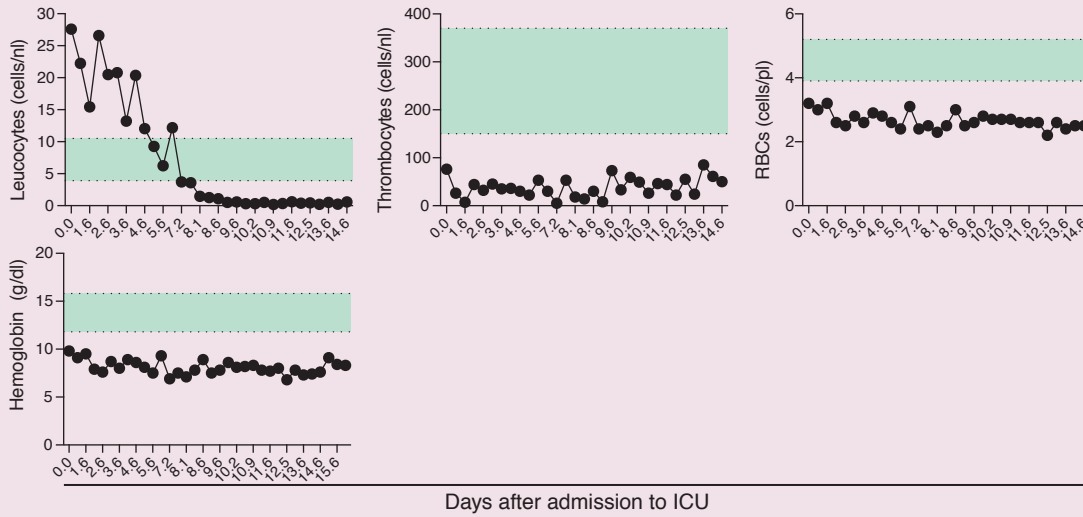

C

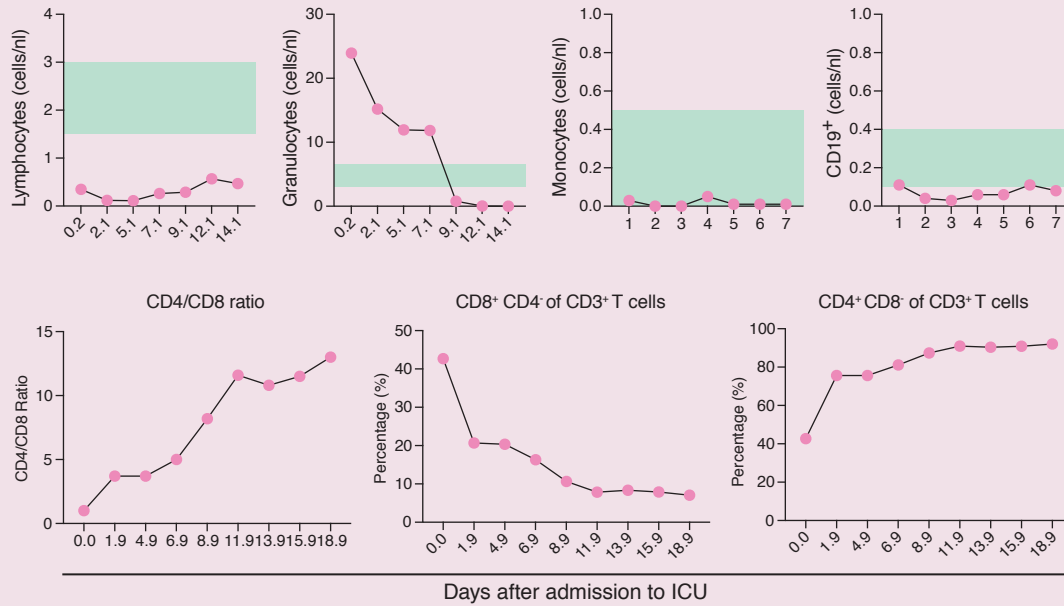

## Supplementary Table S1

### A. Microbiological cultures

| Days after admission | Tested material | Results                                                         | Comments |
|----------------------|-----------------|-----------------------------------------------------------------|----------|
| Day 2                | Blood culture   | no bacterial growth                                             |          |
| Day 2                | Blood culture   | no bacterial growth                                             |          |
| Day 2                | Urine culture   | no bacterial growth                                             |          |
| Day 6                | Stool           | <i>Clostridium difficile</i> Glutamate Dehydrogenase - negative |          |
| Day 9                | Stool           | <i>Clostridium difficile</i> Glutamate Dehydrogenase - negative |          |
| Day 11               | Blood culture   | no bacterial growth                                             |          |
| Day 11               | Urine culture   | no bacterial growth                                             |          |
| Day 15               | Blood culture   | no bacterial growth                                             |          |
| Day 15               | Blood culture   | no bacterial growth                                             |          |
| Day 15               | Blood culture   | no bacterial growth                                             |          |
| Day 15               | Blood culture   | no bacterial growth                                             |          |
| Day 15               | Blood culture   | no fungal growth                                                |          |
| Day 15               | Urine culture   | no bacterial growth                                             |          |
| Day 18               | Blood culture   | no bacterial growth                                             |          |
| Day 18               | Blood culture   | no bacterial growth                                             |          |
| Day 18               | Blood culture   | no bacterial growth                                             |          |
| Day 24               | Blood culture   | no bacterial growth                                             |          |
| Day 24               | Urine culture   | no bacterial growth                                             |          |
| Day 24               | Blood culture   | no fungal growth                                                |          |

### B. Specific microbiological assays

| Days after admission | Tested material | Tested pathogen                                                            | Results              | Comments                    |
|----------------------|-----------------|----------------------------------------------------------------------------|----------------------|-----------------------------|
| Day 0                | Serum           | <i>Treponema pallidum</i> -specific antibodies                             | negative             |                             |
| Day 15               | BAL             | <i>Pneumocystis jirovecii</i> antigen<br><i>Pneumocystis jirovecii</i> IFT | negative<br>negative | BAL: Bronchoalveolar lavage |
| Day 17               | Urine           | <i>Leg. pneumophila</i> . Serotype 1-Antigen                               | negative             |                             |
| Day 17               | BAL             | <i>Aspergillus</i> Antigen                                                 | negative             | BAL: Bronchoalveolar lavage |
| Day 17               | BAL             | <i>Chlamydia pneumoniae</i> -DNA-PCR                                       | negative             | BAL: Bronchoalveolar lavage |
| Day 17               | BAL             | <i>Legionella pneumophila</i> -DNA-PCR                                     | negative             | BAL: Bronchoalveolar lavage |
| Day 17               | BAL             | <i>Mycoplasma pneumoniae</i> -DNA-PCR                                      | negative             | BAL: Bronchoalveolar lavage |

## Supplementary Table S2

### A. SARS-CoV 2 molecular diagnostics

| Days after admission | Tested material      |                       | Results                      | Comments                                                                                                                                                                                                                                                                                      |
|----------------------|----------------------|-----------------------|------------------------------|-----------------------------------------------------------------------------------------------------------------------------------------------------------------------------------------------------------------------------------------------------------------------------------------------|
| Day 0                | nasopharyngeal swabs | SARS-CoV-2-RNA (PCR)  | Not detected                 |                                                                                                                                                                                                                                                                                               |
| Day 6                | nasopharyngeal swabs | SARS-CoV-2-RNA (PCR)  | Not detected                 |                                                                                                                                                                                                                                                                                               |
| Day 10               | nasopharyngeal swabs | SARS-CoV-2-RNA (PCR)  | Not detected                 |                                                                                                                                                                                                                                                                                               |
| Day 14               | nasopharyngeal swabs | SARS-CoV-2-RNA (PCR)  | Positive                     | Ct Threshold: <30 cycles                                                                                                                                                                                                                                                                      |
| Day 14               | nasopharyngeal swabs | SARS-CoV-2 Sequencing | B.1.1.7 (17/17 B.1.1.7 SNPs) | Mutations in S-Gene:<br>- IHV68I: ND<br>- K417T: ND<br>- K417N: ND<br>- N439K: ND<br>- L452R: ND<br>- Y453F: ND<br>- E484K: ND<br>- E484Q: ND<br>- N501Y: D<br>- D614G: D<br>- Q677H: ND<br>- P681H: D<br>- P681R: ND<br>- V1176F: Not enough coverage<br><br>(ND: not detected; D: Detected) |
| Day 27               | nasopharyngeal swabs | SARS-CoV-2-RNA (PCR)  | Positive                     | Ct Threshold: <30 cycles                                                                                                                                                                                                                                                                      |
| Day 29               | nasopharyngeal swabs | SARS-CoV-2-RNA (PCR)  | Positive                     | Ct Threshold: >30 cycles                                                                                                                                                                                                                                                                      |
| Day 34               | nasopharyngeal swabs | SARS-CoV-2-RNA (PCR)  | Positive                     | Ct Threshold: >30 cycles                                                                                                                                                                                                                                                                      |

### B. Viral serology

| Days after admission | Tested material |                     | Results     | Comments |
|----------------------|-----------------|---------------------|-------------|----------|
| Day 1                | Serum           | HIV-DUO SE          | negative    |          |
| Day 2                | Serum           | EBV-VCA-IgG (EIA)   | >750 U/ml   |          |
| Day 2                | Serum           | EBV-VCA-IgM (EIA)   | negative    |          |
| Day 2                | Serum           | EBV-EBNA1-IgG (EIA) | 229 U/ml    |          |
| Day 2                | Serum           | CMV-IgG (EIA)       | 100.1 AE/ml |          |
| Day 22               | Serum           | HIV-DUO SE          | negative    |          |
| Day 23               | Serum           | HBc-Antibodies      | negative    |          |
| Day 23               | Serum           | HBs-Antibodies      | 205 U/l     |          |

|        |       |                              |          |  |
|--------|-------|------------------------------|----------|--|
| Day 23 | Serum | Hepatitis C Virus Antibodies | negative |  |
| Day 23 | Serum | HBs-Antigen                  | negative |  |

### C. Molecular viral testing

| Days after admission | Tested material |                                                           | Results      | Comments |
|----------------------|-----------------|-----------------------------------------------------------|--------------|----------|
| Day 2                | Blood           | <i>Epstein-Barr Virus</i> (EBV) DNA - PCR                 | Not detected |          |
| Day 2                | Plasma          | <i>Cytomegalovirus</i> (CMV)-DNA- PCR                     | Not detected |          |
| Day 17               | BAL             | SARS-Coronavirus 2-RNA (Multiplex-PCR)                    | Positive     |          |
| Day 17               | BAL             | <i>Respiratory syncytial virus A</i> -RNA (Multiplex-PCR) | Not detected |          |
| Day 17               | BAL             | <i>Respiratory syncytial virus B</i> -RNA (Multiplex-PCR) | Not detected |          |
| Day 17               | BAL             | <i>Influenza A</i> -Virus-RNA (Multiplex-PCR)             | Not detected |          |
| Day 17               | BAL             | <i>Influenza B</i> -Virus-RNA (Multiplex-PCR)             | Not detected |          |
| Day 17               | BAL             | <i>Parainfluenza 1</i> -RNA (Multiplex-PCR)               | Not detected |          |
| Day 17               | BAL             | <i>Parainfluenza 2</i> -RNA (Multiplex-PCR)               | Not detected |          |
| Day 17               | BAL             | <i>Parainfluenza 3</i> -RNA (Multiplex-PCR)               | Not detected |          |
| Day 17               | BAL             | <i>Parainfluenza 4</i> -RNA (Multiplex-PCR)               | Not detected |          |
| Day 17               | BAL             | <i>Metapneumovirus</i> -RNA (Multiplex-PCR)               | Not detected |          |
| Day 17               | BAL             | <i>Coronavirus 229E</i> -RNA (Multiplex-PCR)              | Not detected |          |
| Day 17               | BAL             | <i>Coronavirus NL63</i> -RNA (Multiplex-PCR)              | Not detected |          |
| Day 17               | BAL             | <i>Coronavirus HKU1</i> -RNA (Multiplex-PCR)              | Not detected |          |
| Day 17               | BAL             | <i>Coronavirus OC43</i> -RNA (Multiplex-PCR)              | Not detected |          |
| Day 17               | BAL             | <i>Bocavirus</i> -DNA (Multiplex-PCR)                     | Not detected |          |
| Day 17               | BAL             | <i>Influenza A H1N1/2009</i> (Multiplex-PCR)              | Not detected |          |
| Day 17               | BAL             | <i>Influenza A H1</i> (Multiplex-PCR)                     | Not detected |          |
| Day 17               | BAL             | <i>Influenza A H3</i> (Multiplex-PCR)                     | Not detected |          |
| Day 17               | BAL             | <i>Enterovirus/Rhinovirus</i> (Multiplex-PCR)             | Not detected |          |
| Day 17               | BAL             | <i>Adenovirus</i> -DNA (Multiplex-PCR)                    | Not detected |          |
